# Supplementary material for: Singlet to triplet conversion in molecular hydrogen and its role in parahydrogen induced polarization
Source: Royal Society of Chemistry journal article supplement (doi:10.1039/d1cp03164c), 2021-01-01
Supplement: d1cp03164c1.pdf [file d1cp03164c1.pdf]

Electronic Supporting Information (ESI) for the paper

## Singlet-triplet conversion in molecular hydrogen and its role in parahydrogen induced polarization

Danil A. Markelov,<sup>a</sup> Vitaly P. Kozinenko,<sup>a</sup> Stephan Knecht,<sup>b</sup> Alexey S. Kiryutin,<sup>a</sup> Alexandra V. Yurkovskaya,<sup>a\*</sup> Konstantin L. Ivanov<sup>a</sup>

<sup>a</sup> International Tomography Center and Novosibirsk State University, Novosibirsk, 630090, Russia

<sup>b</sup> NVision-Imaging Technologies, Ulm, 89081, Germany

\* Corresponding author, email: yurk@tomo.nsc.ru

This file contains the following information:

|                                                                      |           |
|----------------------------------------------------------------------|-----------|
| <b>1. Model of singlet-triplet conversion in H<sub>2</sub></b> ..... | <b>S1</b> |
| <b>2. Optimization of experimental parameters</b> .....              | <b>S3</b> |

## 1. Model of singlet-triplet conversion in H<sub>2</sub>

To implement the model for singlet-triplet conversion we numerically solved the equations for  $\sigma_f$  and  $\sigma_b$  given in the main article.

In this model, we first specify the Hamiltonians

$$\hat{H}_f = 0, \quad \hat{H}_b = \frac{1}{2}\delta\omega\{\hat{I}_{1z} - \hat{I}_{2z}\}$$

Thus, we neglect any spin evolution in the free form of H<sub>2</sub> and consider only a single term in  $\hat{H}_b$ , which originates from the frequency difference of the two protons in the bound form. After that, we go to the Liouville space and specify  $\sigma_f$  and  $\sigma_b$  as column vectors with 16 elements (corresponding to a two-spin system). In this representation,  $\hat{H}_{f,b}$  are written as superoperators, which are  $16 \times 16$  matrices, whereas the relaxation superoperators are also matrices  $\hat{\Gamma}_{f,b}$ . To specify all elements of  $\hat{\Gamma}_{f,b}$  we use the model of partly correlated fluctuating local fields,  $B^{(1)}(t)$  and  $B^{(2)}(t)$ , experienced by the two spins. This means, that we use the same method as before<sup>1,2</sup> but averaging of the local fields is performed using the following expressions (here  $g(\tau)$  is the auto-correlation function of the process):

$$\langle B_i^{(1)}(t)B_j^{(1)}(t+\tau) \rangle = \langle B^2 \rangle \delta_{ij}g(\tau),$$

$$\langle B_i^{(2)}(t)B_j^{(2)}(t+\tau) \rangle = \langle B^2 \rangle \delta_{ij}g(\tau),$$

$$\langle B_i^{(1)}(t)B_j^{(2)}(t+\tau) \rangle = C \times \langle B^2 \rangle \delta_{ij}g(\tau)$$

Hence, different components are non-correlated while the amplitudes and auto-correlation functions of the two fields are the same. The parameter  $\langle B^2 \rangle$  determines the effective relaxation rate in the system in the free or bound form,  $T_1^f$  and  $T_1^b$ . Specifically, in the limiting narrowing case, each  $T_1$ -value is related to  $\langle B^2 \rangle$  as follows:  $T_1^{-1} = 2\tau_c \langle B^2 \rangle$ , where  $\tau_c$  is the motional correlation time. Hereafter, all products of the field components are expressed via  $1/T_1$ , omitting all unnecessary coefficients. The coefficient  $C$  defines the degree, to which the two fields are correlated:  $C = 0$  means independent correlations and  $C = 1$  means complete correlation. Here, we use  $C$  approaching unity, meaning that the singlet-triplet relaxation transitions are much slower than the relaxation transitions in the triplet manifold. We take  $C = 0.9$  in order to keep singlet-triplet transitions operative (for  $C = 1$  singlet-triplet relaxation is turned off).

To solve numerically the set of equations

$$\begin{cases} \frac{d}{dt}\sigma_f = -i[\hat{H}_f, \sigma_f] - \hat{\Gamma}_f \sigma_f - k_{as}\sigma_f + k_{dis}\sigma_b \\ \frac{d}{dt}\sigma_b = -i[\hat{H}_b, \sigma_b] - \hat{\Gamma}_b \sigma_b - k_{dis}\sigma_b + k_{as}\sigma_f \end{cases}$$

we proceed as follows. First, we compose a vector made out of  $\sigma_f$  and  $\sigma_b$ :

$$\sigma = \begin{pmatrix} \sigma_f \\ \sigma_b \end{pmatrix}$$

and, second, rewrite the system in one equation:

$$\frac{d}{dt}\sigma = \hat{A}\sigma, \quad \text{where} \quad \hat{A} = \begin{pmatrix} -i\hat{H}_f - \hat{\Gamma}_f - k_{as}\hat{\mathbb{1}} & k_{dis}\hat{\mathbb{1}} \\ k_{as}\hat{\mathbb{1}} & -i\hat{H}_b - \hat{\Gamma}_b - k_{dis}\hat{\mathbb{1}} \end{pmatrix}$$

Here  $\hat{\mathbb{1}}$  is the unity  $16 \times 16$  matrix. Using this equation, we can compute the  $\sigma$ -vector at any instant of time:

$$\sigma(t) = \exp[\hat{A}t]\sigma(0)$$

Knowing  $\sigma$ , we can calculate any parameter of interest, e.g., the populations of the spin states of H<sub>2</sub>.

Parameters used in the calculations are:

- ✓ exchange reaction rates:  $k_{as} = 6 \text{ s}^{-1}$ ,  $k_{dis} = 60 \text{ s}^{-1}$
- ✓ relaxation times  $T_1^f = 3 \text{ s}$ ,  $T_1^b = 1 \text{ s}$ ,  $C = 0.99$
- ✓ the value of  $\delta\omega/2\pi$  was varied

## 2. Optimization of experimental parameters

The dependence of the signal enhancement in the SLIC-SABRE scheme is shown in **Figure 1S**. The optimal timing is given by  $t_d = 500$  ms,  $t_{cw} = 39$  ms, which was used in all experiments.

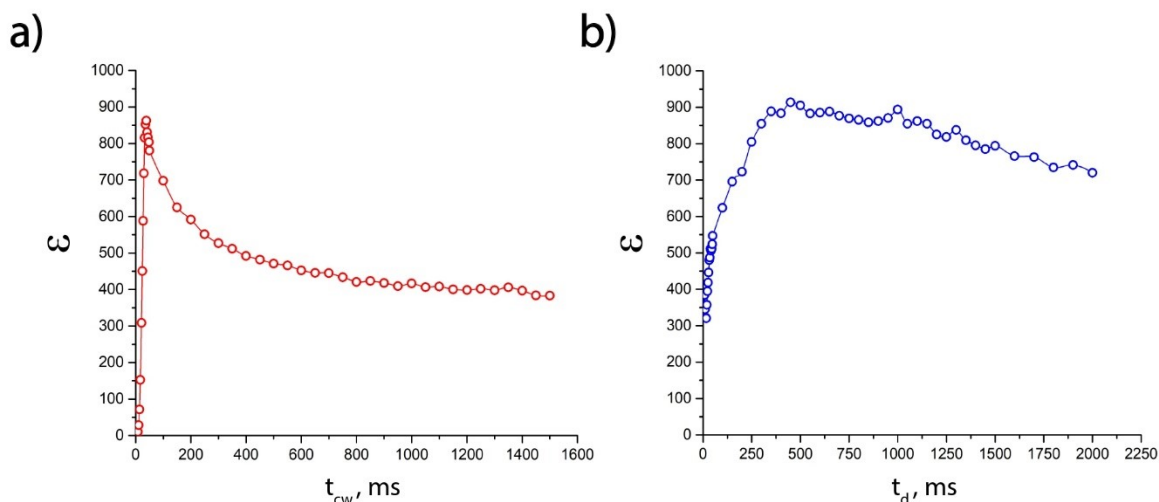

**Figure 1S.** Dependence of the  $^{15}\text{N}$  signal enhancement (a) on the duration  $t_{cw}$  of the CW pulse (with  $t_d = 250$  ms) and (b) on the delay between polarization transfer cycles  $t_d$  (with  $t_{cw} = 39$  ms.). The experiments were performed with  $[S] = 60$  mM and  $[C] = 9.5$  mM. SLIC-SABRE parameters were set as follows:  $\omega_1/2\pi = 10$  Hz, offset  $\Delta/2\pi = -14$  Hz, number of repetitions  $n = 50$ .

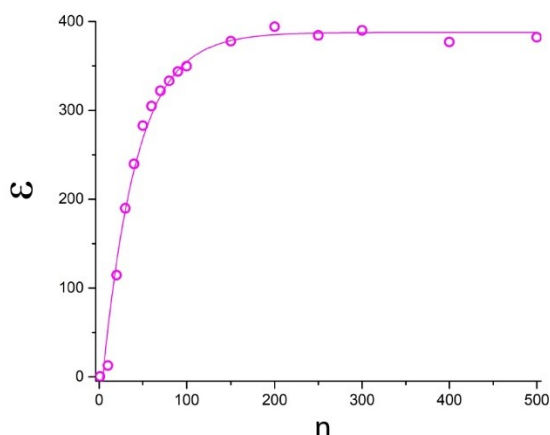

**Figure 2S.** Dependence of the  $^{15}\text{N}$  signal enhancement on the number of polarization cycles  $n$ . The experiments were performed using the SLIC-SABRE method with 192 mM of the substrate (containing 10% of  $^{15}\text{N}$  nuclei). SLIC-SABRE parameters were set as follows:  $\omega_1/2\pi = 10$  Hz, offset  $\Delta/2\pi = -14$  Hz,  $t_d = 500$  ms,  $t_{cw} = 39$  ms.

The resulting NMR enhancement also strongly depends on the number of repetitions of the polarization transfer cycle. The  $n$ -dependence of the signal enhancement in the SLIC-SABRE scheme is shown in **Figure 2S**. The signal increases with  $n$ , showing that it is usually sufficient to have  $n = 50$  cycles. All experiments reported in the main article have been done with 50 repetitions.

## References

1. S. E. Korchak, K. L. Ivanov, A. V. Yurkovskaya and H.-M. Vieth, *J. Chem. Phys.*, 2010, 133, 194502.
2. K. Ivanov, A. Yurkovskaya and H.-M. Vieth, *J. Chem. Phys.*, 2008, 129, 234513.
